# Supplementary material for: An adhesive 19F MRI chemical probe allows signal off-to-on-type molecular sensing in a biological environment
Source: Royal Society of Chemistry journal article supplement (doi:10.1039/c3cc46471g), 2013-01-01
Supplement: c3cc46471g.pdf [file c3cc46471g.pdf]

## ***Supplementary Information***

for

# **Adhesive $^{19}\text{F}$ MRI chemical probe allows signal off-to-on-type molecular sensing in a biological environment**

Tomohiro Doura, Ryunosuke Hata, Hiroshi Nonaka, Fuminori Sugihara, Yoshichika Yoshioka and  
Shinsuke Sando \*

*INAMORI Frontier Research Center, Kyushu University, 744 Motoooka, Nishi-ku, Fukuoka 819-0395, Japan*  
*Immunology Frontier Research Center, Osaka University, 3-1 Yamadaoka, Suita, Osaka 565-0871, Japan*

\*Corresponding author

E-mail: ssando@ifrc.kyushu-u.ac.jp

### **CONTENTS**

#### **1. Figures S1-S2**

#### **2. Methods**

##### **2-1. Synthesis**

##### **2-2. $^{19}\text{F}$ NMR measurements**

##### **2-3. $^{19}\text{F}$ MRI measurements**

#### **3. References**

## 1. Figures S1-S2

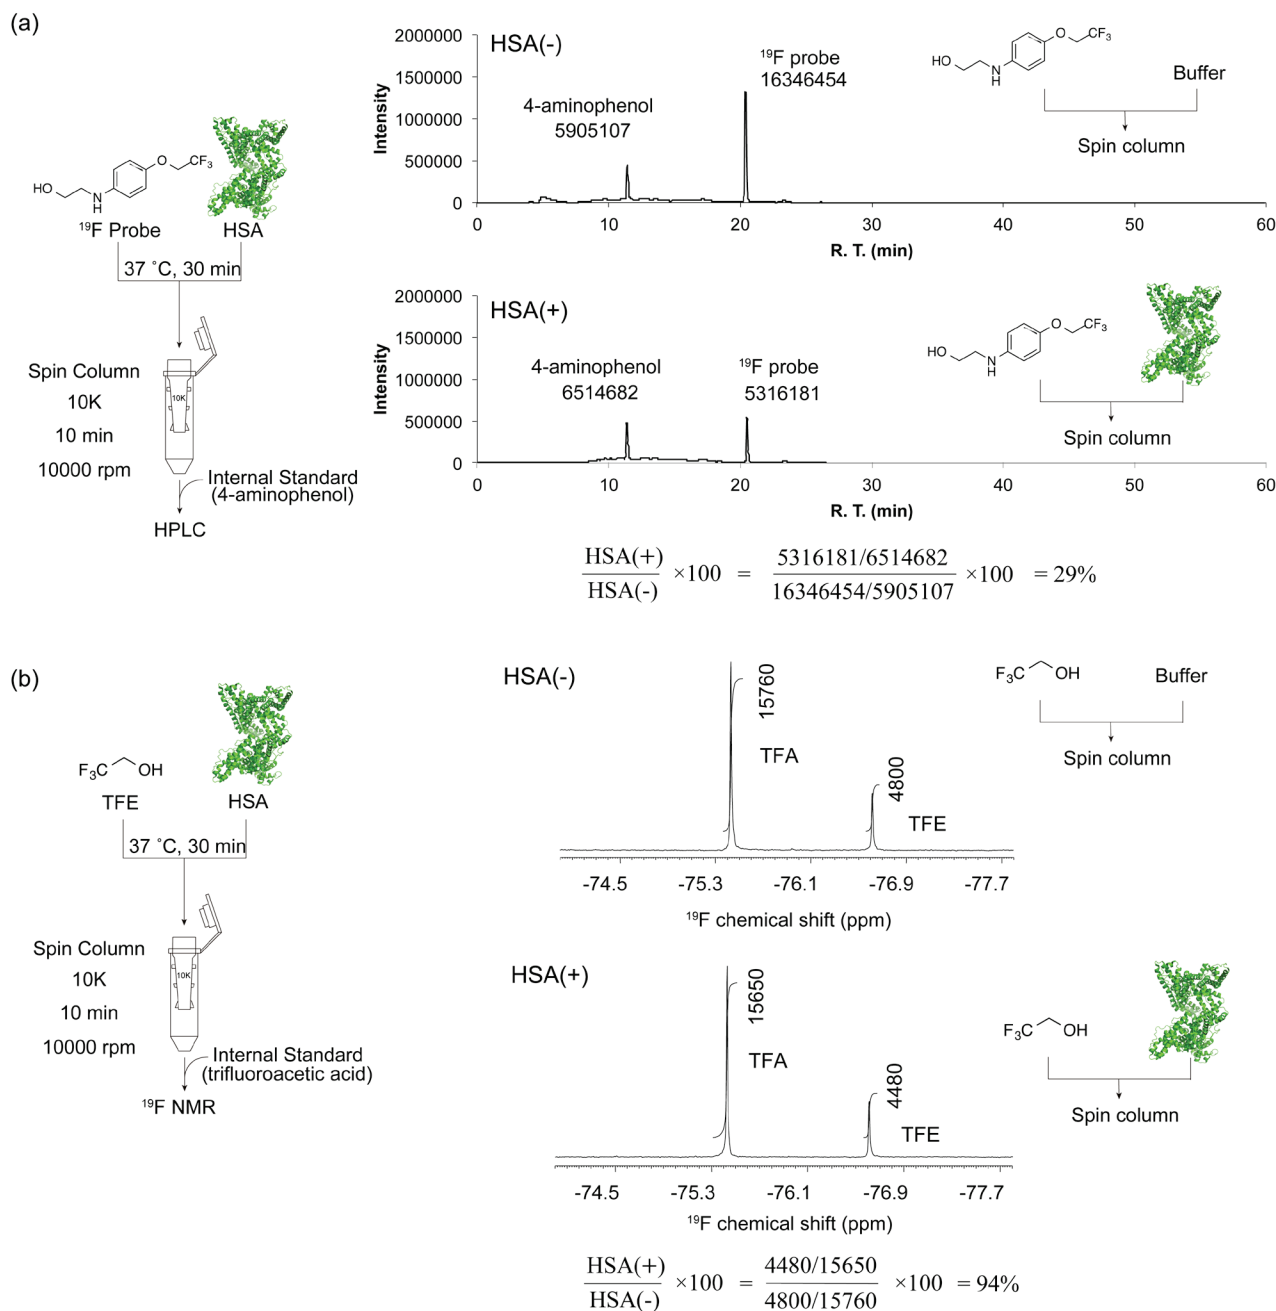

**Fig. S1** Evaluation of adhesive property of probe **1** and product trifluoroethanol to HSA. a) Probe **1** (400  $\mu\text{M}$ ) or b) product trifluoroethanol (400  $\mu\text{M}$ ) was mixed with HSA (50  $\text{g L}^{-1}$ ) in 100 mM sodium phosphate buffer (pH 7.4) containing 150 mM NaCl. The mixture was filtered through ultrafiltration cartridge (Amicon Ultra MWCO 10 K, 9,300 g, 10 min). a) Probe **1** or b) product trifluoroethanol in filtrate was quantified by HPLC-UV or  $^{19}\text{F}$  NMR, respectively. Recovery yields of probe and product were determined as  $\text{HSA}(+)/\text{HSA}(-) = 29$  and 94%, respectively, suggesting that probe **1** tends to adhere to HSA, while product trifluoroethanol does not.

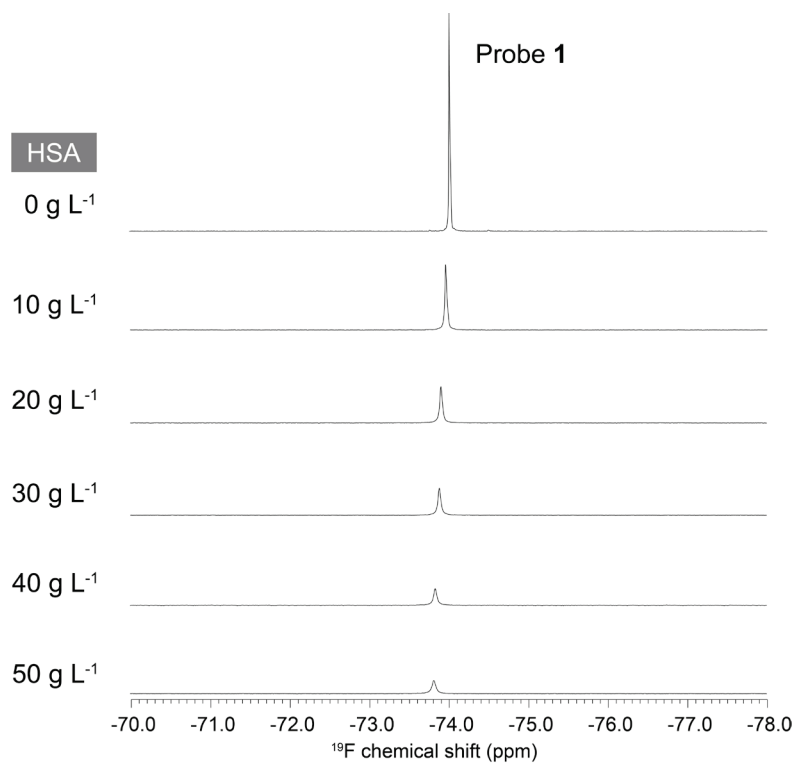

**Fig. S2**  $^{19}\text{F}$  NMR (long spin echo time, TE = 20 ms) of probe **1** solution (5 mM) in 100 mM sodium phosphate buffer (pH 7.4) containing 150 mM NaCl in the presence of HSA (0, 10, 20, 30, 40, and 50 g L<sup>-1</sup>).

## 2. Methods

### 2.1. Synthesis

#### General

Reagents and solvents were purchased from standard suppliers and used without further purification.  $^1\text{H}$  NMR (2.50 ppm for  $\text{DMSO-}d_6$  as an internal standard) and  $^{13}\text{C}$  NMR (39.5 ppm for  $\text{DMSO-}d_6$  as an internal standard) spectra were acquired using a Bruker Avance III spectrometer (400 MHz for  $^1\text{H}$  NMR). Mass spectra (MS) were measured using a JEOL JMS-HX110A (FAB).

#### 2-((4-(2,2,2-Trifluoroethoxy)phenyl)amino)ethanol (**1**)

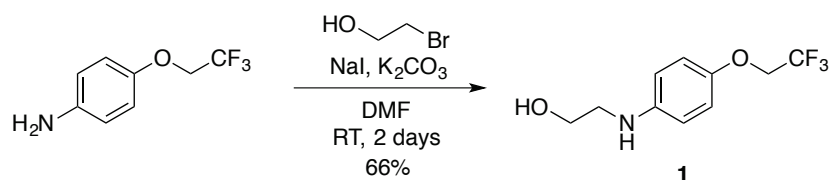

2-Bromoethanol (746 mg, 5.97 mmol), sodium iodide (603 mg, 4.02 mmol) and potassium carbonate (603 mg, 4.36 mmol) were added to a solution of 4-(2,2,2-trifluoroethoxy)aniline (645 mg, 3.37 mmol)<sup>S1</sup> in DMF (1.5 mL) and stirred for 2 days at room temperature. Saturated NH<sub>4</sub>Cl aqueous solution was added to the reaction mixture and the mixture was extracted with CHCl<sub>3</sub> three times. The organic layer was evaporated to dryness. The resulting residue was purified by silica-gel column chromatography (AcOEt/*n*-hexane = 1/1) twice to give **1** as a pale yellow solid (520 mg, 2.21 mmol, 66%).  $^1\text{H}$  NMR ( $\text{DMSO-}d_6$ ):  $\delta$ . 6.82 (d,  $J$  = 8.8 Hz, 2H), 6.54 (d,  $J$  = 8.8 Hz, 2H), 5.20 (t,  $J$  = 5.9 Hz, 1H), 4.63 (t,  $J$  = 5.9 Hz, 1H), 4.55 (q,  $J$  = 8.9 Hz, 2H), 3.53 (m, 2H), 3.03 (m, 2H).  $^{13}\text{C}$  NMR ( $\text{DMSO-}d_6$ ):  $\delta$ . 148.8, 145.0, 124.7 (q,  $J$  = 276 Hz), 116.7, 113.3, 66.2 (q,  $J$  = 33.5 Hz), 60.2, 46.7. HRMS (FAB<sup>+</sup>): calculated for C<sub>10</sub>H<sub>12</sub>O<sub>2</sub>NF<sub>3</sub> (M<sup>+</sup>) = 235.0815, observed = 235.0824.

## 2-2. $^{19}\text{F}$ NMR measurements

### General

$^{19}\text{F}$  NMR spectra were measured on a Bruker Avance III spectrometer (376 MHz for  $^{19}\text{F}$  NMR). Chemical shifts are reported in ppm (trifluorotoluene  $\delta = -62.7$  ppm).

### $^{19}\text{F}$ NMR measurements of $^{19}\text{F}$ chemical probe 1 reacted with HOCl in phosphate buffer (Fig. 2b)

HOCl (final concentration, 0-10 mM) was added to an aqueous solution of  $^{19}\text{F}$  chemical probe 1 (final concentration, 5 mM) in 100 mM sodium phosphate buffer (pH 7.4) containing 150 mM NaCl with or without human serum albumin ( $50 \text{ g L}^{-1}$ ). The solutions were incubated for 10 min at  $37^\circ\text{C}$ . An aliquot of the solution ( $450 \mu\text{L}$ ) was mixed with  $\text{D}_2\text{O}$  ( $50 \mu\text{L}$ ) and subjected to a  $^{19}\text{F}$  NMR analysis. Twenty ms of spin echo time (TE) was used.

## 2-3. $T_2$ -weighted $^{19}\text{F}$ MRI measurements

### General

$^{19}\text{F}$  MRI images were acquired on a Bruker Avance II spectrometer (470 MHz for  $^{19}\text{F}$ ), equipped Micro2.5 imaging probe with 25 mm inner diameter  $^{19}\text{F}$  coil.  $^{19}\text{F}$  images were acquired by RARE (Rapid Acquisition with Relation Enhancement) method. The imaging parameters for Fig. 2b: TR/TE=4000/11.1 ms, matrix =  $32 \times 32$  (zero-filled to  $64 \times 64$  for analysis), field of view =  $50 \text{ mm} \times 50 \text{ mm}$ , slice thickness = 30 mm, 32 transients were recorded for each phase step and for Fig. 3: TR/TE=1000/135 ms, matrix =  $32 \times 32$  (zero-filled to  $64 \times 64$  for analysis), field of view =  $50 \text{ mm} \times 50 \text{ mm}$ , slice thickness = 30 mm, 256 transients were recorded for each phase step. The 1 or trifluoroethanol selective images were acquired by setting each peak at the center of acquisition frequency and using Gaussian selective pulse for excitation and refocusing. Samples were filled into 5 mm outer diameter NMR tube and placed as shown in each figure.

### $T_2$ -weighted $^{19}\text{F}$ MRI measurements $^{19}\text{F}$ chemical probe 1 reacted with HOCl in phosphate buffer (Fig. 2b)

HOCl (final concentration, 0-10 mM) was added to an aqueous solution of  $^{19}\text{F}$  chemical probe 1 (final concentration, 5 mM) in 100 mM sodium phosphate buffer (pH 7.4) containing 150 mM NaCl with or without human serum albumin ( $50 \text{ g L}^{-1}$ ). The solutions were incubated for 10 min at  $37^\circ\text{C}$ . An aliquot of the solution ( $450 \mu\text{L}$ ) was mixed with  $\text{D}_2\text{O}$  ( $50 \mu\text{L}$ ) and subjected to a  $T_2$ -weighted  $^{19}\text{F}$  MRI analysis.

**$T_2$ -weighted  $^{19}\text{F}$  MRI measurements of  $^{19}\text{F}$  chemical probes reacted with MPO in phosphate buffer containing blood plasma (Fig. 3)**

$\text{H}_2\text{O}_2$  (final concentration, 4 mM), MPO (final concentration, 0 or 470 nM), and human plasma (final 40% v/v) were added to a solution of **1** (final concentration, 5 mM) in sodium phosphate solution (final concentration, 60 mM, pH 7.4) containing NaCl (final concentration, 90 mM). The reaction solution was incubated for 4 h at 37 °C.

**3. Reference**

S1) T. Doura, Q. An, F. Sugihara, T. Matsuda, S. Sando, *Chem. Lett.* 2011, **40**, 1357.
